# Supplementary material for: Assessment of Genetic Gain Trends for Yield in IRRI Rice Varieties in the Philippines Using “era” Trial Studies and Implications for Future Rice Breeding
Source: Research Square preprint supplement (doi:10.21203/rs.3.rs-1046247/v1), 2021-11-11
Supplement: Supplementary file 1 [file 738a957373e756c4e971b277.xlsx]

## Sheet: LS Means Study 1
Supplementary Table 2. Study 1. LS Means with standard error for yield for varieties from trials used for analysis of genetic gain
Variety	Season	Controlled for Marurity	LS Means kg/hactare	Standard Error	Year of Variety release
IR 8	Dry	No	7119.7	557.84	1966
IR 8	Dry	Yes	7244.87	584.7	1966
IR 8	Wet	No	3652.34	369.35	1966
IR 8	Wet	Yes	3825.03	425.03	1966
IR 8	Wet and Dry	No	5386.02	1589.57	1966
IR 8	Wet and Dry	Yes	5534.95	1587.77	1966
IR 20	Dry	No	6621.13	564.73	1969
IR 20	Dry	Yes	6636.06	553.26	1969
IR 20	Wet	No	2801.83	369.35	1969
IR 20	Wet	Yes	3012.43	446.76	1969
IR 20	Wet and Dry	No	4711.48	1589.57	1969
IR 20	Wet and Dry	Yes	4824.25	1587.77	1969
IR 24	Dry	No	6844.37	557.84	1971
IR 24	Dry	Yes	6969.55	584.7	1971
IR 24	Wet	No	3847.56	369.35	1971
IR 24	Wet	Yes	3868.63	377.28	1971
IR 24	Wet and Dry	No	5345.97	1589.57	1971
IR 24	Wet and Dry	Yes	5419.09	1587.77	1971
IR 26	Dry	No	7472.92	557.84	1973
IR 26	Dry	Yes	7609.01	591.5	1973
IR 26	Wet	No	4098.93	369.35	1973
IR 26	Wet	Yes	4124.74	377.67	1973
IR 26	Wet and Dry	No	5785.93	1589.57	1973
IR 26	Wet and Dry	Yes	5866.88	1587.77	1973
IR 32	Dry	No	6263.51	557.84	1975
IR 32	Dry	Yes	6284.95	547.02	1975
IR 32	Wet	No	3090.85	369.35	1975
IR 32	Wet	Yes	3282.5	435.49	1975
IR 32	Wet and Dry	No	4677.18	1589.57	1975
IR 32	Wet and Dry	Yes	4783.73	1587.77	1975
IR 36	Dry	No	6707.85	557.84	1976
IR 36	Dry	Yes	6659.42	551.83	1976
IR 36	Wet	No	3270.81	369.35	1976
IR 36	Wet	Yes	3154.47	399.26	1976
IR 36	Wet and Dry	No	4989.33	1589.57	1976
IR 36	Wet and Dry	Yes	4906.94	1587.77	1976
IR 42	Dry	No	6724.12	557.84	1977
IR 42	Dry	Yes	6850.38	585.35	1977
IR 42	Wet	No	3861.29	369.35	1977
IR 42	Wet	Yes	4154.81	504.08	1977
IR 42	Wet and Dry	No	5292.71	1589.57	1977
IR 42	Wet and Dry	Yes	5502.6	1587.77	1977
IR 50	Dry	No	6551.86	557.84	1979
IR 50	Dry	Yes	6496.87	553.55	1979
IR 50	Wet	No	4062.93	369.35	1979
IR 50	Wet	Yes	3982.14	387.65	1979
IR 50	Wet and Dry	No	5307.4	1589.57	1979
IR 50	Wet and Dry	Yes	5239.5	1587.77	1979
IR 58	Dry	No	6740.69	557.84	1983
IR 58	Dry	Yes	6664.96	560.38	1983
IR 58	Wet	No	2980.07	369.35	1983
IR 58	Wet	Yes	2676.58	511.72	1983
IR 58	Wet and Dry	No	4860.38	1589.57	1983
IR 58	Wet and Dry	Yes	4670.77	1587.77	1983
IR 60	Dry	No	6547.22	557.84	1983
IR 60	Dry	Yes	6485.68	555.48	1983
IR 60	Wet	No	3654.41	369.35	1983
IR 60	Wet	Yes	3485.95	422.8	1983
IR 60	Wet and Dry	No	5100.82	1589.57	1983
IR 60	Wet and Dry	Yes	4985.82	1587.77	1983
IR 62	Dry	No	6697.55	557.84	1984
IR 62	Dry	Yes	6650.21	551.57	1984
IR 62	Wet	No	3205.11	369.35	1984
IR 62	Wet	Yes	3249.87	379.97	1984
IR 62	Wet and Dry	No	4951.33	1589.57	1984
IR 62	Wet and Dry	Yes	4950.04	1587.77	1984
IR 64	Dry	No	7186.65	557.84	1985
IR 64	Dry	Yes	7160.05	547.66	1985
IR 64	Wet	No	4224.19	369.35	1985
IR 64	Wet	Yes	4091.27	405.96	1985
IR 64	Wet and Dry	No	5705.42	1589.57	1985
IR 64	Wet and Dry	Yes	5625.66	1587.77	1985
IR 66	Dry	No	6269.97	557.84	1987
IR 66	Dry	Yes	6219.35	552.38	1987
IR 66	Wet	No	3459.88	369.35	1987
IR 66	Wet	Yes	3530.7	385.1	1987
IR 66	Wet and Dry	No	4864.92	1589.57	1987
IR 66	Wet and Dry	Yes	4875.03	1587.77	1987
IR 70	Dry	No	6532.67	557.84	1988
IR 70	Dry	Yes	6619.63	564.93	1988
IR 70	Wet	No	4439.76	369.35	1988
IR 70	Wet	Yes	4534.27	391.68	1988
IR 70	Wet and Dry	No	5486.21	1589.57	1988
IR 70	Wet and Dry	Yes	5576.95	1587.77	1988
IR 72	Dry	No	5468.89	557.84	1988
IR 72	Dry	Yes	5463.04	545.93	1988
IR 72	Wet	No	3398.61	369.35	1988
IR 72	Wet	Yes	3303.59	391.83	1988
IR 72	Wet and Dry	No	4433.75	1589.57	1988
IR 72	Wet and Dry	Yes	4383.32	1587.77	1988
IR 74	Dry	No	7144.41	557.84	1988
IR 74	Dry	Yes	7168.04	547.27	1988
IR 74	Wet	No	4148.57	369.35	1988
IR 74	Wet	Yes	4124.63	377.51	1988
IR 74	Wet and Dry	No	5646.49	1589.57	1988
IR 74	Wet and Dry	Yes	5646.34	1587.77	1988
IRRI 102	Dry	No	6676.95	557.84	1991
IRRI 102	Dry	Yes	6768.27	566.86	1991
IRRI 102	Wet	No	3739.79	369.35	1991
IRRI 102	Wet	Yes	3898.27	417.75	1991
IRRI 102	Wet and Dry	No	5208.37	1589.57	1991
IRRI 102	Wet and Dry	Yes	5333.27	1587.77	1991
IRRI 103	Dry	No	7064.88	557.84	1991
IRRI 103	Dry	Yes	7004.43	555.15	1991
IRRI 103	Wet	No	3525.7	369.35	1991
IRRI 103	Wet	Yes	3283.8	466.97	1991
IRRI 103	Wet and Dry	No	5295.29	1589.57	1991
IRRI 103	Wet and Dry	Yes	5144.12	1587.77	1991
IRRI 104	Dry	No	7347.73	557.84	1992
IRRI 104	Dry	Yes	7267.63	562.08	1992
IRRI 104	Wet	No	4411.04	369.35	1992
IRRI 104	Wet	Yes	4147.82	481.77	1992
IRRI 104	Wet and Dry	No	5879.39	1589.57	1992
IRRI 104	Wet and Dry	Yes	5707.73	1587.77	1992
IRRI 105	Dry	No	7158.03	557.84	1994
IRRI 105	Dry	Yes	7174.01	546.5	1994
IRRI 105	Wet	No	3413.57	369.35	1994
IRRI 105	Wet	Yes	3718.94	513.17	1994
IRRI 105	Wet and Dry	No	5285.8	1589.57	1994
IRRI 105	Wet and Dry	Yes	5446.48	1587.77	1994
IRRI 106	Dry	No	6029.66	557.84	1994
IRRI 106	Dry	Yes	5969.22	555.15	1994
IRRI 106	Wet	No	3516.43	369.35	1994
IRRI 106	Wet	Yes	3369.3	412.3	1994
IRRI 106	Wet and Dry	No	4773.05	1589.57	1994
IRRI 106	Wet and Dry	Yes	4669.26	1587.77	1994
IRRI 108	Dry	No	6371.53	557.84	1995
IRRI 108	Dry	Yes	6368.95	545.86	1995
IRRI 108	Wet	No	4430.28	369.35	1995
IRRI 108	Wet	Yes	4375.54	381.67	1995
IRRI 108	Wet and Dry	No	5400.9	1589.57	1995
IRRI 108	Wet and Dry	Yes	5372.24	1587.77	1995
IRRI 109	Dry	No	6102.3	557.84	1995
IRRI 109	Dry	Yes	6134.67	548.52	1995
IRRI 109	Wet	No	4350.24	369.35	1995
IRRI 109	Wet	Yes	4290.76	382.59	1995
IRRI 109	Wet and Dry	No	5226.27	1589.57	1995
IRRI 109	Wet and Dry	Yes	5212.71	1587.77	1995
IRRI 115	Dry	No	7350.63	557.84	1997
IRRI 115	Dry	Yes	7324.03	547.66	1997
IRRI 115	Wet	No	3418.97	369.35	1997
IRRI 115	Wet	Yes	3368.97	380.82	1997
IRRI 115	Wet and Dry	No	5384.8	1589.57	1997
IRRI 115	Wet and Dry	Yes	5346.5	1587.77	1997
IRRI 116	Dry	No	6973.2	557.84	1997
IRRI 116	Dry	Yes	6961.89	546.17	1997
IRRI 116	Wet	No	3980.32	369.35	1997
IRRI 116	Wet	Yes	3927.95	381.23	1997
IRRI 116	Wet and Dry	No	5476.76	1589.57	1997
IRRI 116	Wet and Dry	Yes	5444.92	1587.77	1997
IRRI 118	Dry	No	6785.67	557.84	1997
IRRI 118	Dry	Yes	6811.48	547.55	1997
IRRI 118	Wet	No	3723.48	369.35	1997
IRRI 118	Wet	Yes	3607.15	399.26	1997
IRRI 118	Wet and Dry	No	5254.58	1589.57	1997
IRRI 118	Wet and Dry	Yes	5209.31	1587.77	1997
IRRI 119	Dry	No	8615.52	557.84	1997
IRRI 119	Dry	Yes	8627.14	546.19	1997
IRRI 119	Wet	No	3909.67	380.07	1997
IRRI 119	Wet	Yes	4108.43	448.66	1997
IRRI 119	Wet and Dry	No	6262.6	1589.57	1997
IRRI 119	Wet and Dry	Yes	6367.78	1587.77	1997
IRRI 121	Dry	No	7489	564.73	1997
IRRI 121	Dry	Yes	7491.62	552.9	1997
IRRI 121	Wet	No	4043.84	369.35	1997
IRRI 121	Wet	Yes	4057.8	376.85	1997
IRRI 121	Wet and Dry	No	5766.42	1589.57	1997
IRRI 121	Wet and Dry	Yes	5774.71	1587.77	1997
IRRI 122	Dry	No	7362.62	557.84	2000
IRRI 122	Dry	Yes	7355.68	545.97	2000
IRRI 122	Wet	No	3509.14	369.35	2000
IRRI 122	Wet	Yes	3425.98	388.31	2000
IRRI 122	Wet and Dry	No	5435.88	1589.57	2000
IRRI 122	Wet and Dry	Yes	5390.83	1587.77	2000
IRRI 123	Dry	No	7539.26	557.84	2000
IRRI 123	Dry	Yes	7474.44	556.53	2000
IRRI 123	Wet	No	4244.13	369.35	2000
IRRI 123	Wet	Yes	4267.57	377.47	2000
IRRI 123	Wet and Dry	No	5891.69	1589.57	2000
IRRI 123	Wet and Dry	Yes	5871.01	1587.77	2000
IRRI 135	Dry	No	6904.44	557.84	2002
IRRI 135	Dry	Yes	6852.73	552.67	2002
IRRI 135	Wet	No	4554.98	369.35	2002
IRRI 135	Wet	Yes	4490.76	383.59	2002
IRRI 135	Wet and Dry	No	5729.71	1589.57	2002
IRRI 135	Wet and Dry	Yes	5671.75	1587.77	2002
IRRI 136	Dry	No	7708.97	557.84	2002
IRRI 136	Dry	Yes	7650.71	554.49	2002
IRRI 136	Wet	No	4750.53	369.35	2002
IRRI 136	Wet	Yes	4672.1	387.02	2002
IRRI 136	Wet and Dry	No	6229.75	1589.57	2002
IRRI 136	Wet and Dry	Yes	6161.41	1587.77	2002
IRRI 138	Dry	No	8113.69	557.84	2002
IRRI 138	Dry	Yes	8071.8	550.33	2002
IRRI 138	Wet	No	4753.46	369.35	2002
IRRI 138	Wet	Yes	4561.32	435.78	2002
IRRI 138	Wet and Dry	No	6433.58	1589.57	2002
IRRI 138	Wet and Dry	Yes	6316.56	1587.77	2002
IRRI 141	Dry	No	7066.48	557.84	2003
IRRI 141	Dry	Yes	7126.14	554.91	2003
IRRI 141	Wet	No	3916.69	369.35	2003
IRRI 141	Wet	Yes	4042	402.79	2003
IRRI 141	Wet and Dry	No	5491.59	1589.57	2003
IRRI 141	Wet and Dry	Yes	5584.07	1587.77	2003
IRRI 144	Dry	No	8036	557.84	2006
IRRI 144	Dry	Yes	7978.83	554.17	2006
IRRI 144	Wet	No	3323.82	369.35	2006
IRRI 144	Wet	Yes	3285.66	379.03	2006
IRRI 144	Wet and Dry	No	5679.91	1589.57	2006
IRRI 144	Wet and Dry	Yes	5632.25	1587.77	2006
IRRI 145	Dry	No	5926.95	557.84	2007
IRRI 145	Dry	Yes	5856.67	558.38	2007
IRRI 145	Wet	No	4669.35	369.35	2007
IRRI 145	Wet	Yes	4586.19	388.31	2007
IRRI 145	Wet and Dry	No	5298.15	1589.57	2007
IRRI 145	Wet and Dry	Yes	5221.43	1587.77	2007
IRRI 146	Dry	No	7214.63	557.84	2007
IRRI 146	Dry	Yes	7227.34	546.26	2007
IRRI 146	Wet	No	4630.7	369.35	2007
IRRI 146	Wet	Yes	4708.64	386.89	2007
IRRI 146	Wet and Dry	No	5922.67	1589.57	2007
IRRI 146	Wet and Dry	Yes	5967.99	1587.77	2007
IRRI 150	Dry	No	7095.74	557.84	2007
IRRI 150	Dry	Yes	7113.91	546.69	2007
IRRI 150	Wet	No	4029.17	369.35	2007
IRRI 150	Wet	Yes	4109.47	387.52	2007
IRRI 150	Wet and Dry	No	5562.45	1589.57	2007
IRRI 150	Wet and Dry	Yes	5611.69	1587.77	2007
IRRI 151	Dry	No	7051.57	557.84	2009
IRRI 151	Dry	Yes	7093.76	550.39	2009
IRRI 151	Wet	No	3554.24	369.35	2009
IRRI 151	Wet	Yes	3629.8	386.28	2009
IRRI 151	Wet and Dry	No	5302.9	1589.57	2009
IRRI 151	Wet and Dry	Yes	5361.78	1587.77	2009
IRRI 154	Dry	No	7932.33	557.84	2009
IRRI 154	Dry	Yes	7926.47	545.93	2009
IRRI 154	Wet	No	4344.79	369.35	2009
IRRI 154	Wet	Yes	4432.2	389.52	2009
IRRI 154	Wet and Dry	No	6138.56	1589.57	2009
IRRI 154	Wet and Dry	Yes	6179.34	1587.77	2009
IRRI 156	Dry	No	6872.74	557.84	2011
IRRI 156	Dry	Yes	6857.06	546.47	2011
IRRI 156	Wet	No	5129.67	369.35	2011
IRRI 156	Wet	Yes	5155.48	377.67	2011
IRRI 156	Wet and Dry	No	6001.2	1589.57	2011
IRRI 156	Wet and Dry	Yes	6006.27	1587.77	2011
IRRI 158	Dry	No	8032.18	557.84	2011
IRRI 158	Dry	Yes	7976.1	553.86	2011
IRRI 158	Wet	No	4376.77	369.35	2011
IRRI 158	Wet	Yes	4191.73	431.75	2011
IRRI 158	Wet and Dry	No	6204.48	1589.57	2011
IRRI 158	Wet and Dry	Yes	6083.92	1587.77	2011
IRRI 164	Dry	No	6985.92	557.84	2011
IRRI 164	Dry	Yes	6964.78	546.99	2011
IRRI 164	Wet	No	4229.87	369.35	2011
IRRI 164	Wet	Yes	4241.47	376.75	2011
IRRI 164	Wet and Dry	No	5607.9	1589.57	2011
IRRI 164	Wet and Dry	Yes	5603.12	1587.77	2011
IRRI 168	Dry	No	7313.97	557.84	2013
IRRI 168	Dry	Yes	7316.85	545.86	2013
IRRI 168	Wet	No	4649.3	369.35	2013
IRRI 168	Wet	Yes	4651.42	376.52	2013
IRRI 168	Wet and Dry	No	5981.63	1589.57	2013
IRRI 168	Wet and Dry	Yes	5984.13	1587.77	2013
